# Supplementary material for: Time-resolved studies define the nature of toxic IAPP intermediates, providing insight for anti-amyloidosis therapeutics
Source: eLife journal article supplement (doi:10.7554/elife.12977), 2016-05-23

Figure 7-Figure Supplement 2

A

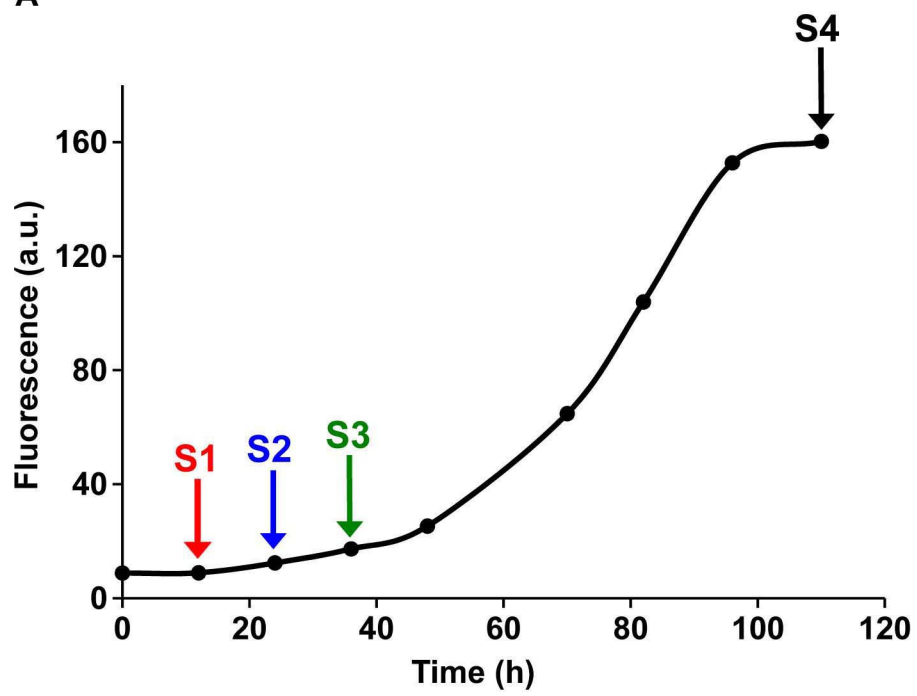

Figure 7-Figure Supplement 2

B

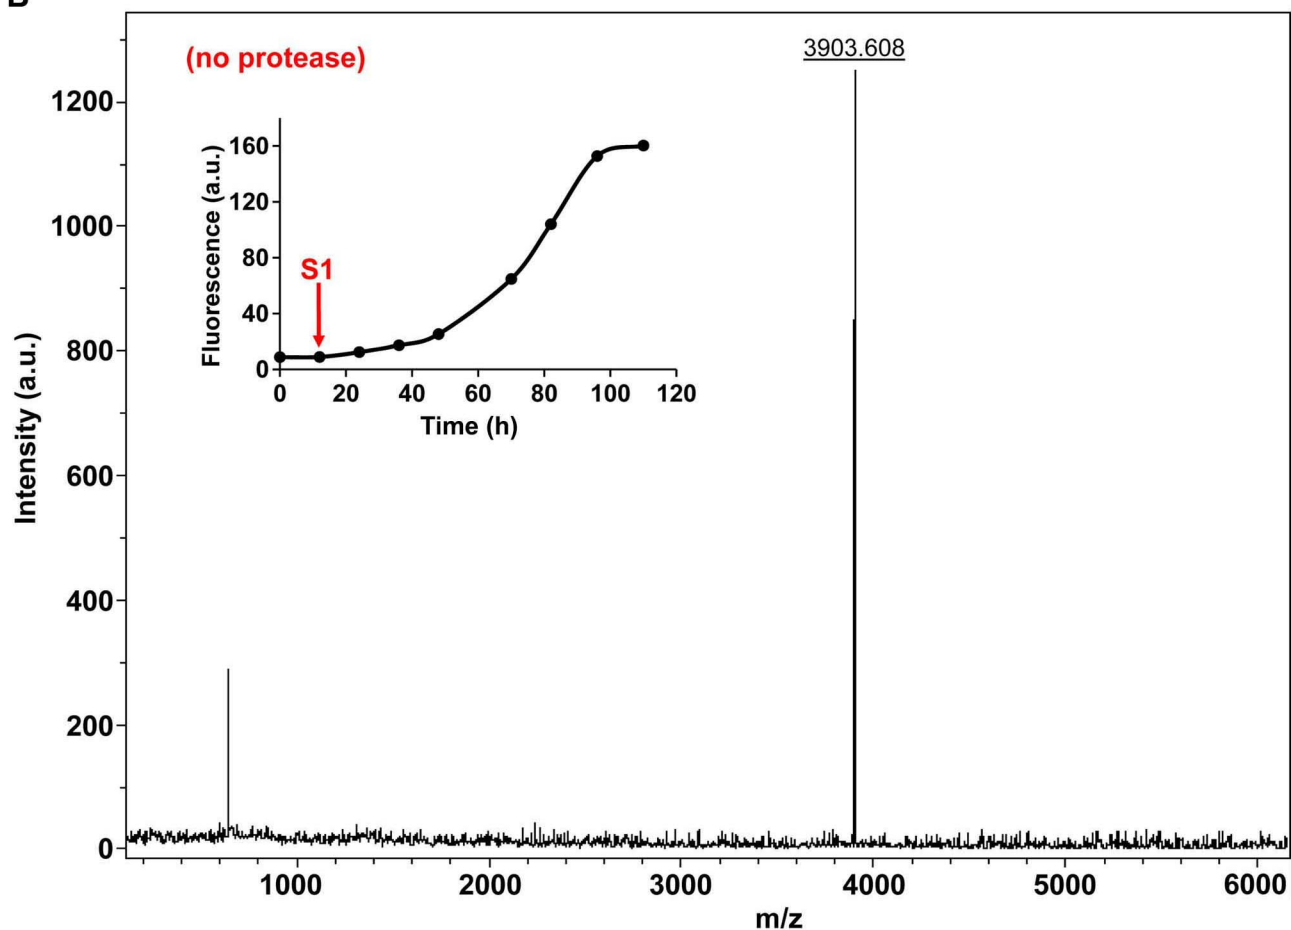

C

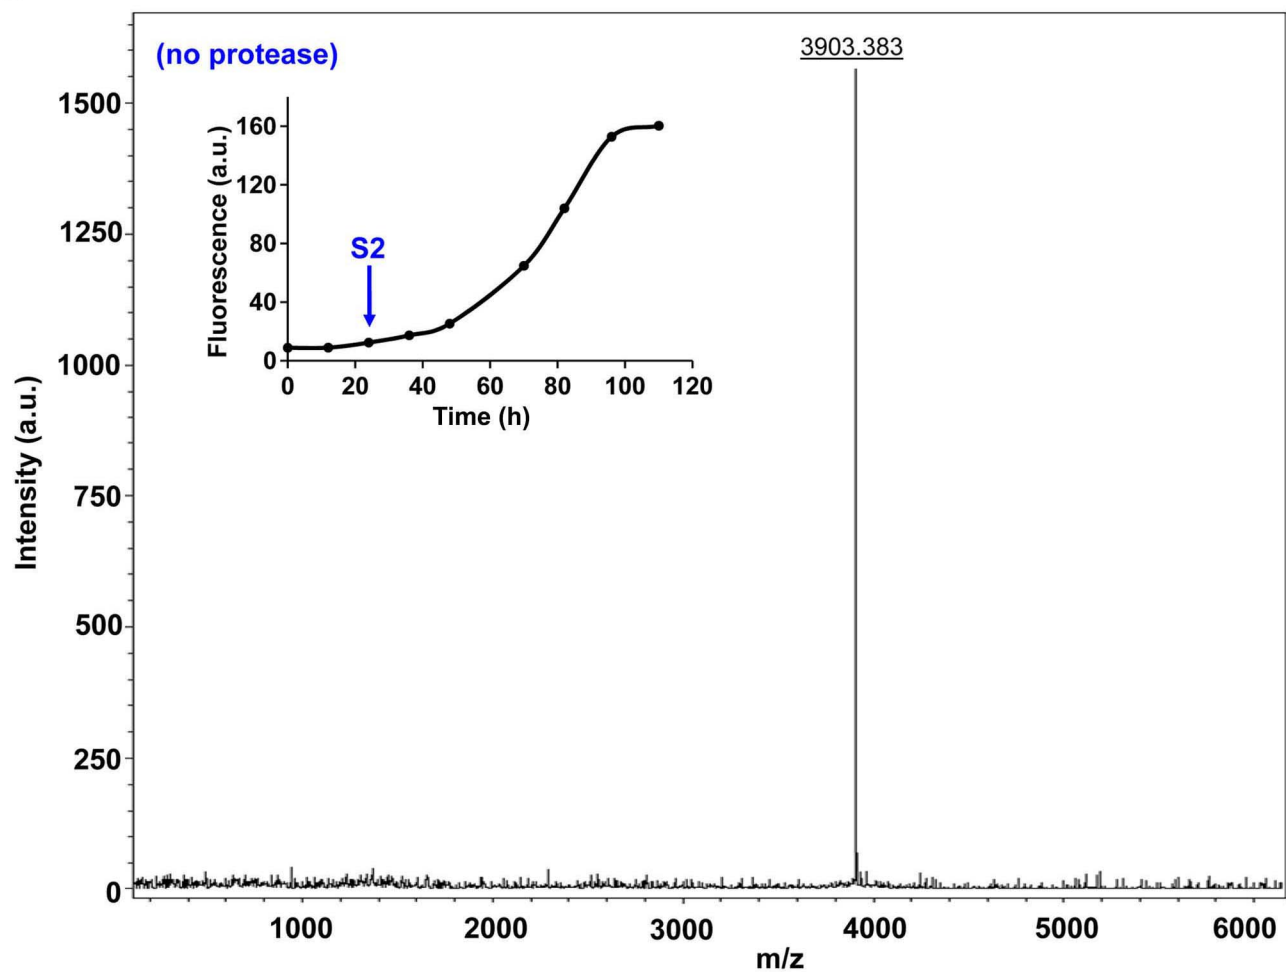

Figure 7-Figure Supplement 2

D

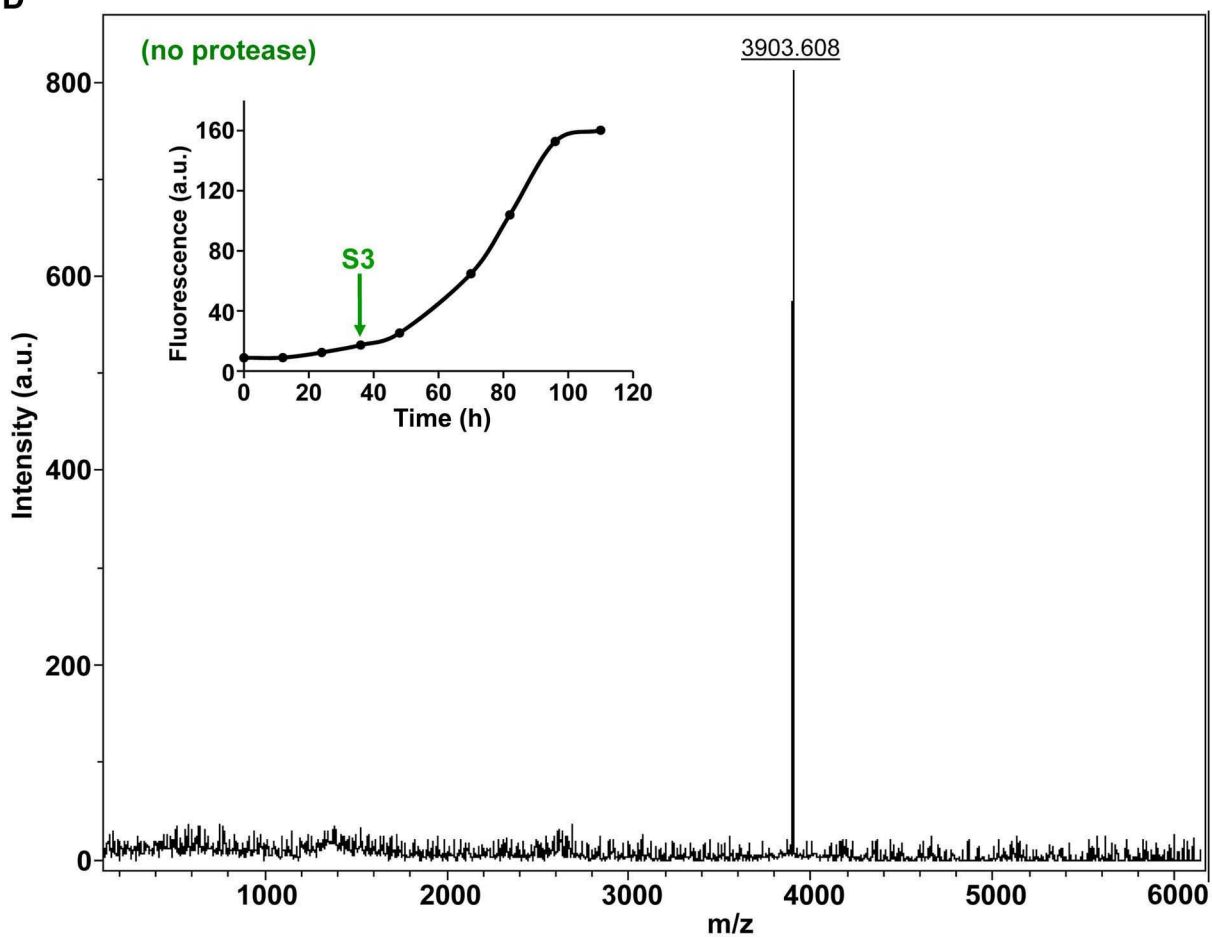

E

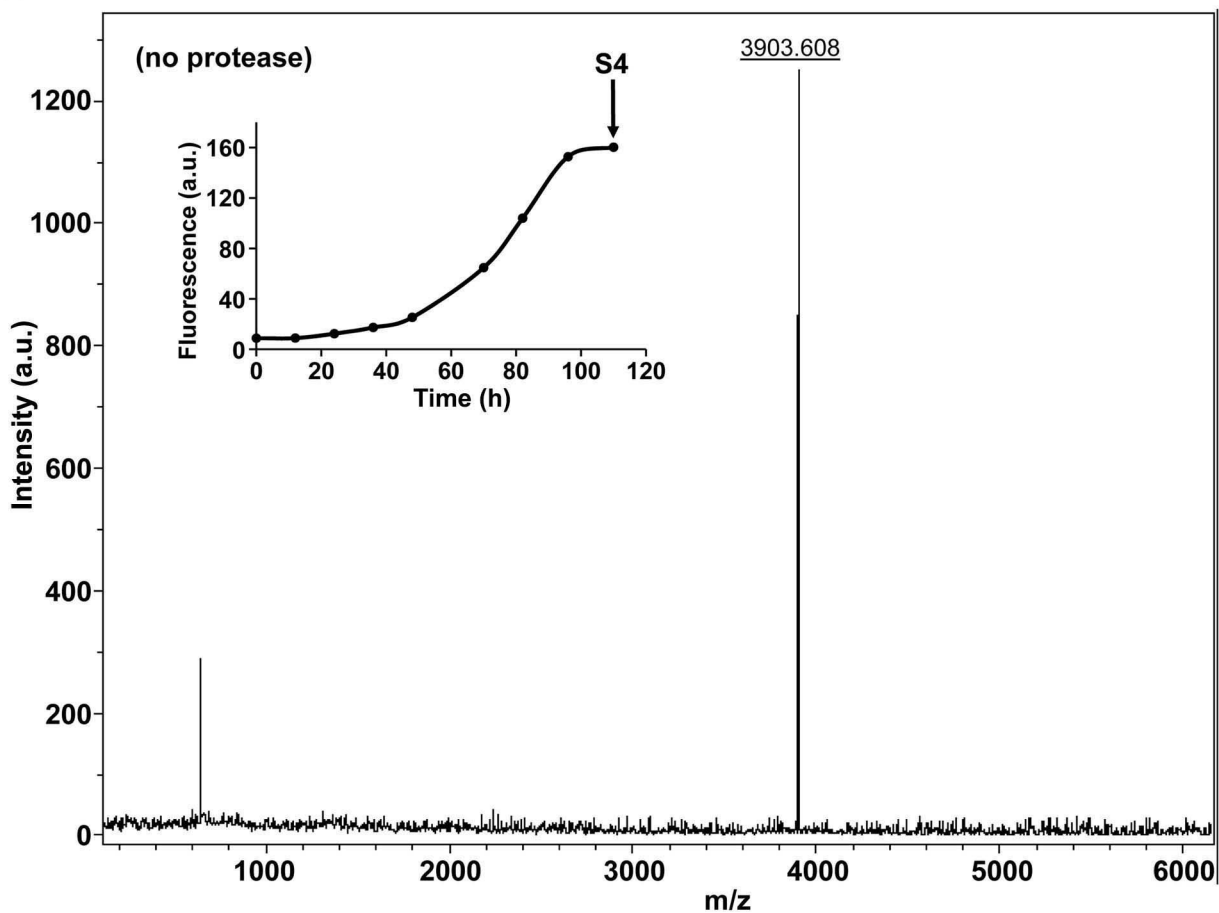

Figure 7-Figure Supplement 2

F

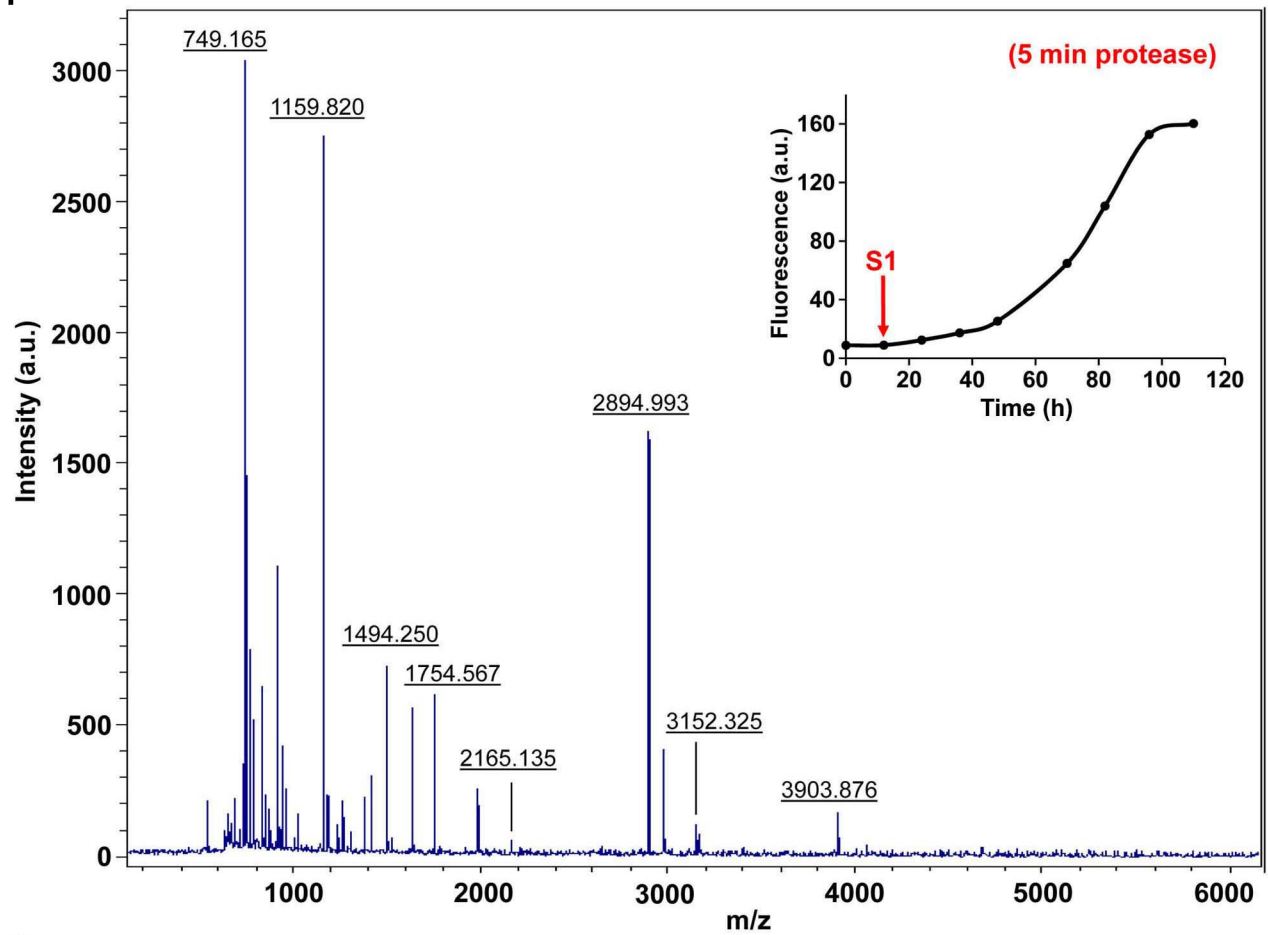

G

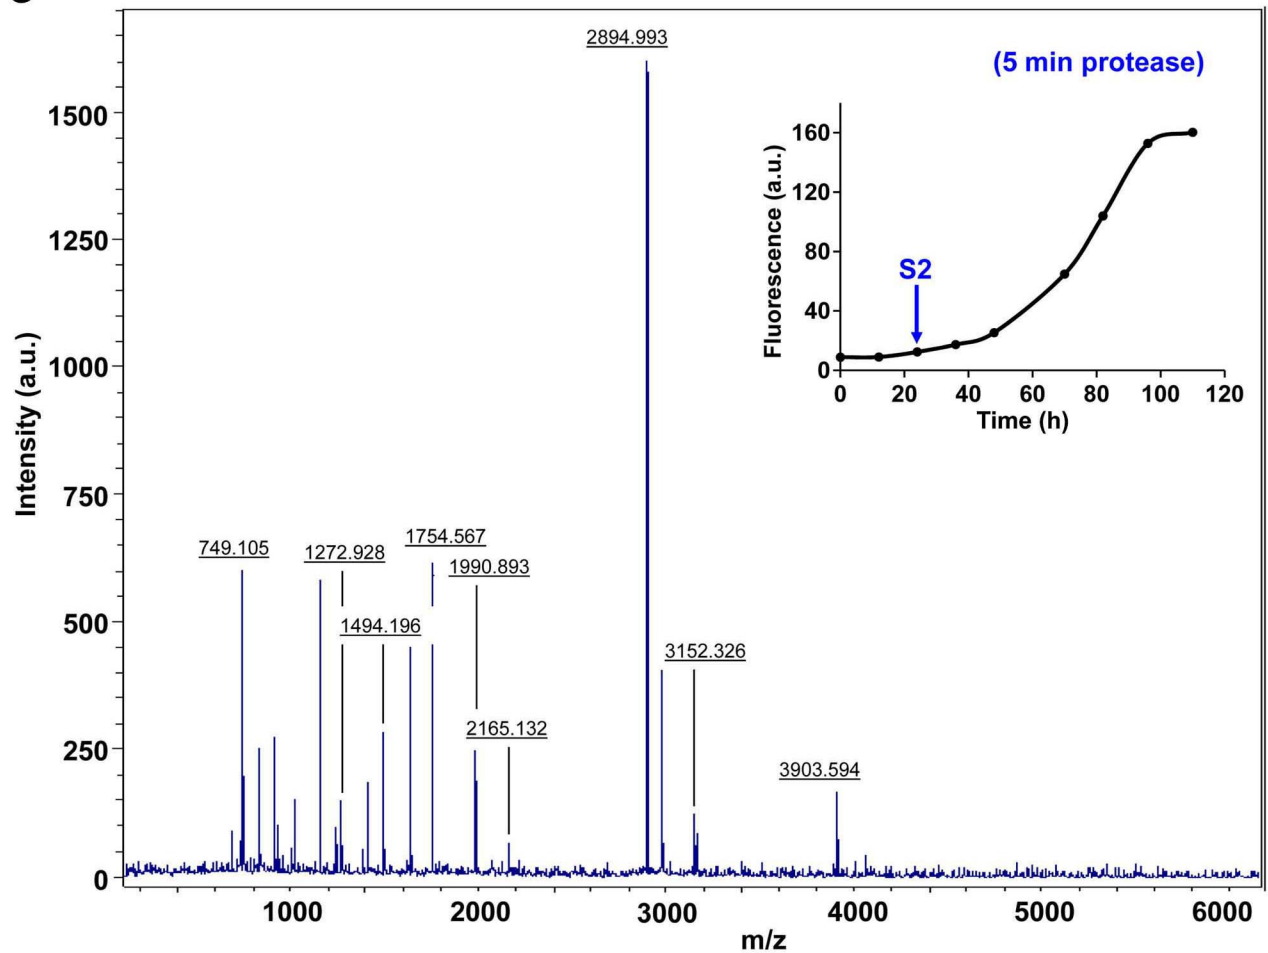

Figure 7-Figure Supplement 2

H

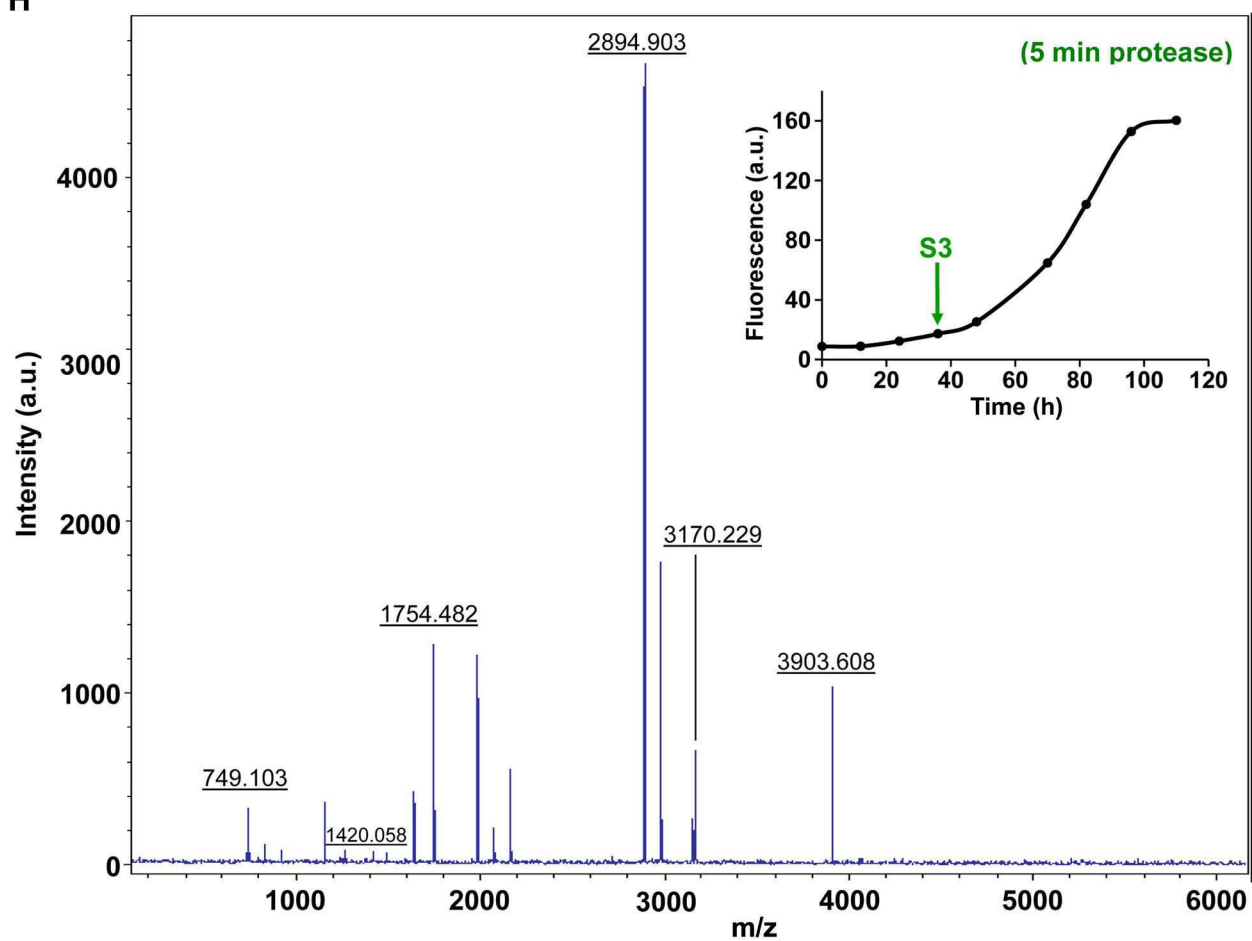

I

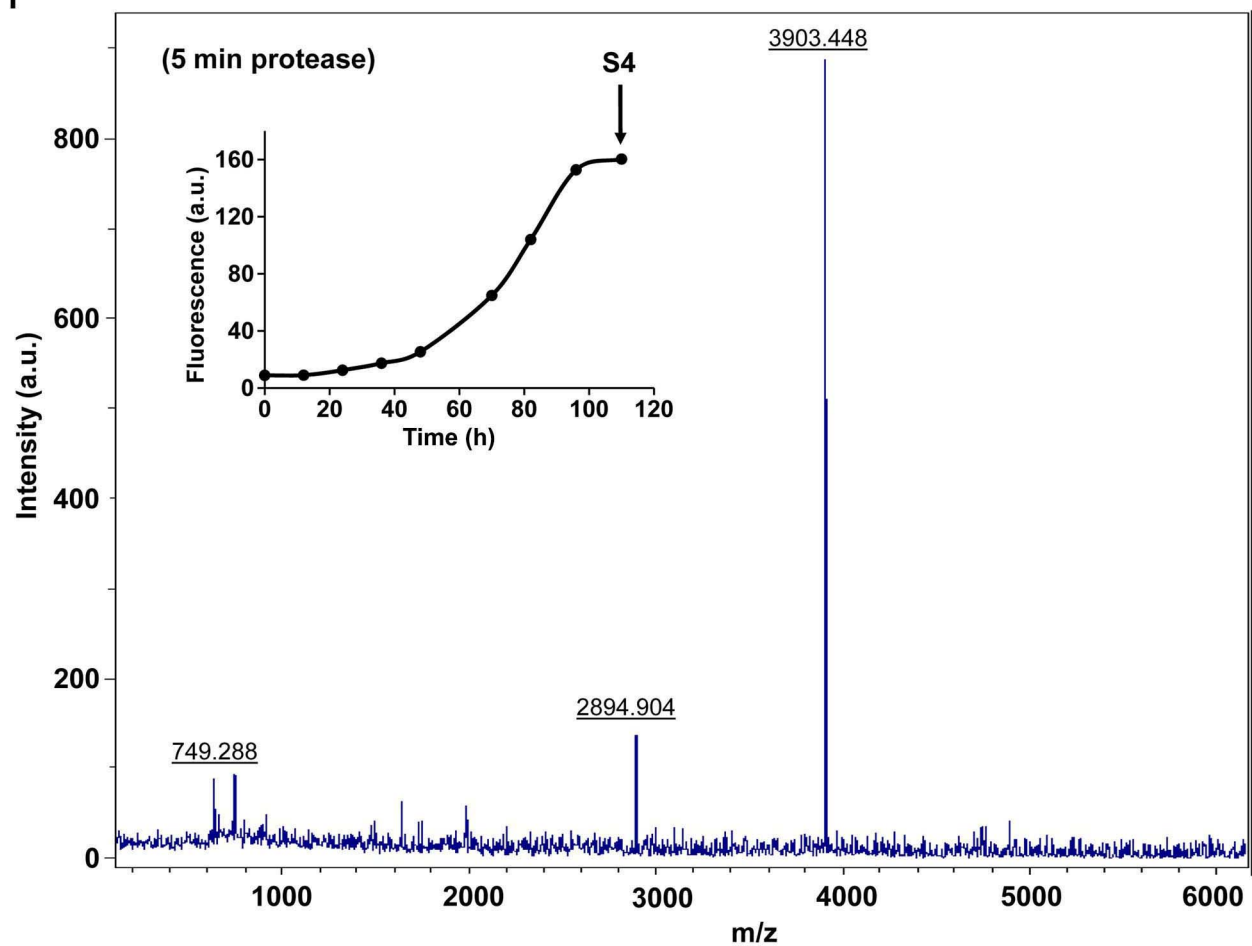

Figure 7-Figure Supplement 2

J

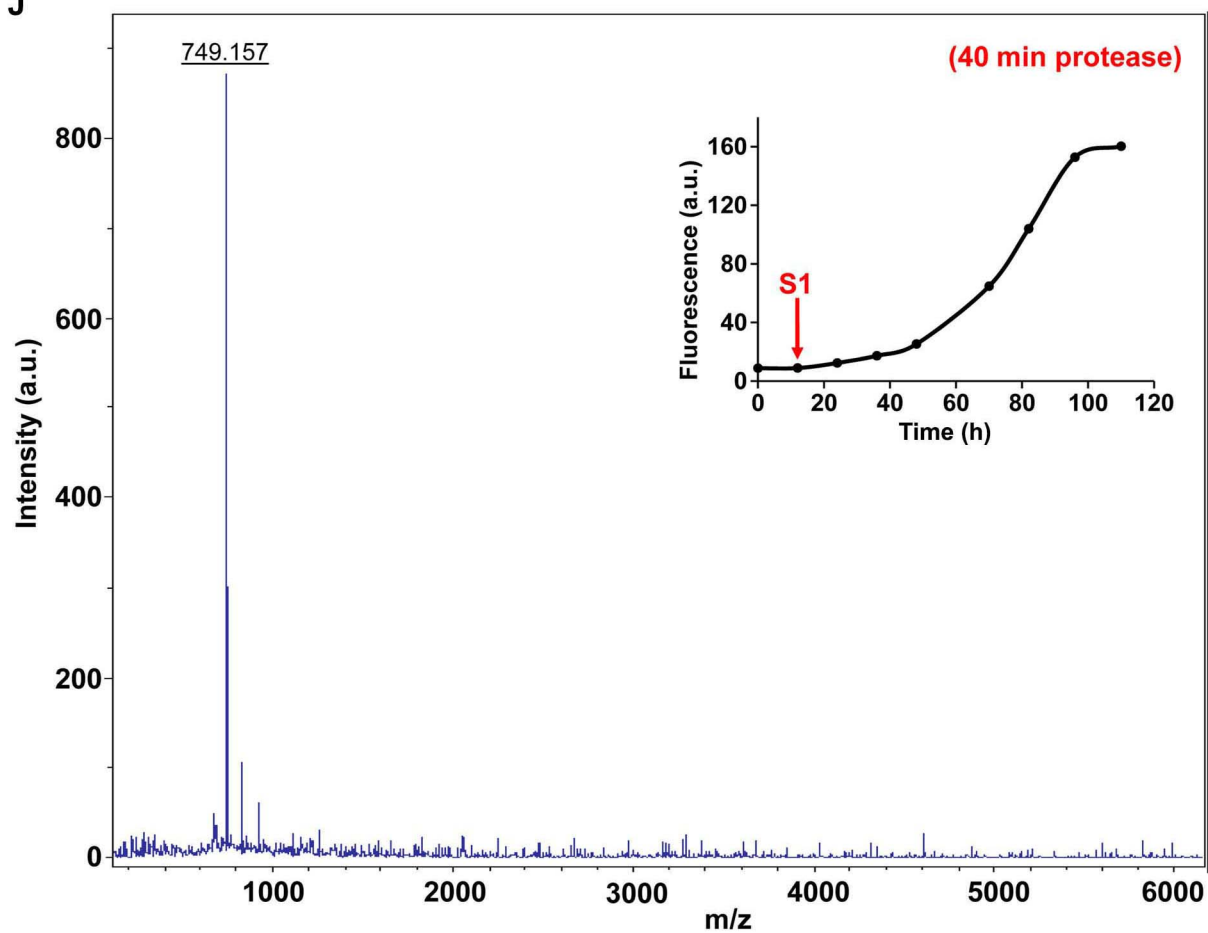

K

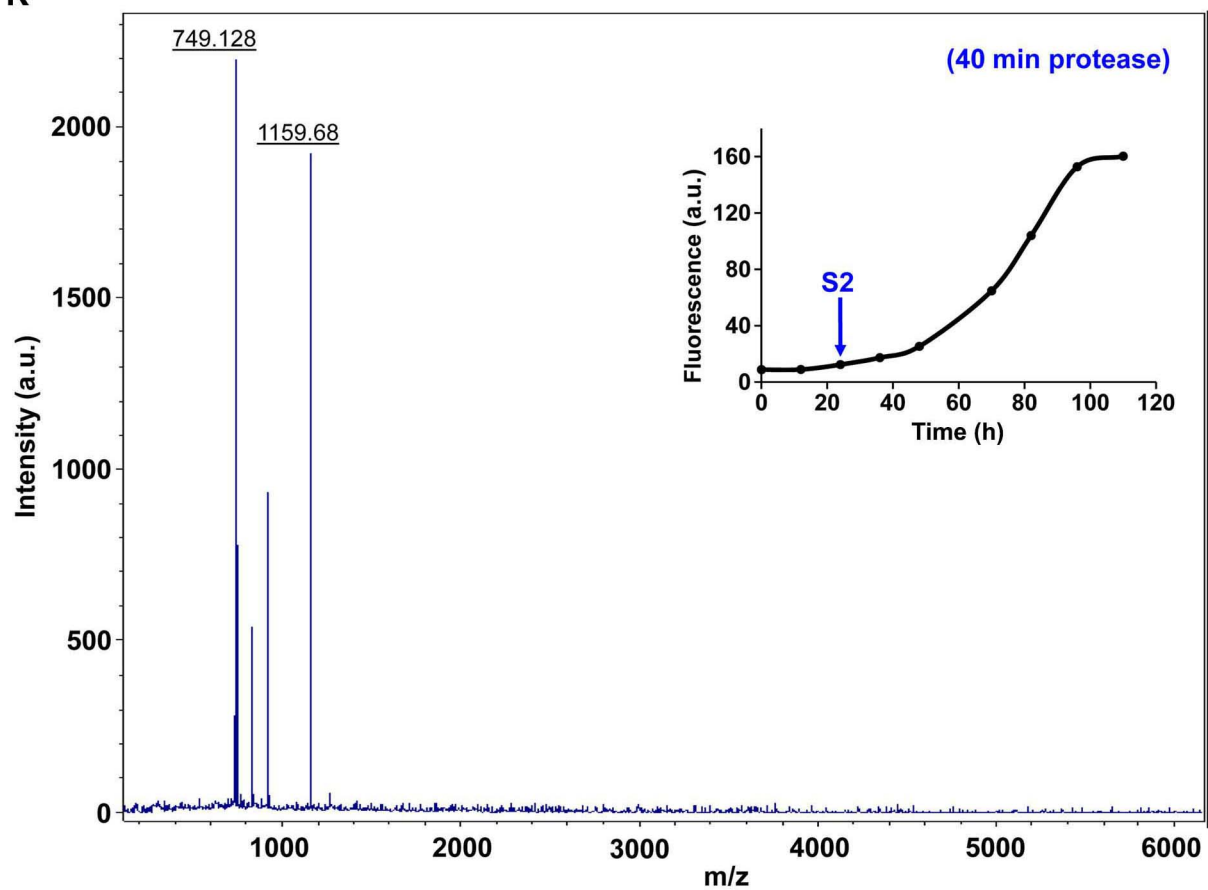

Figure 7-Figure Supplement 2

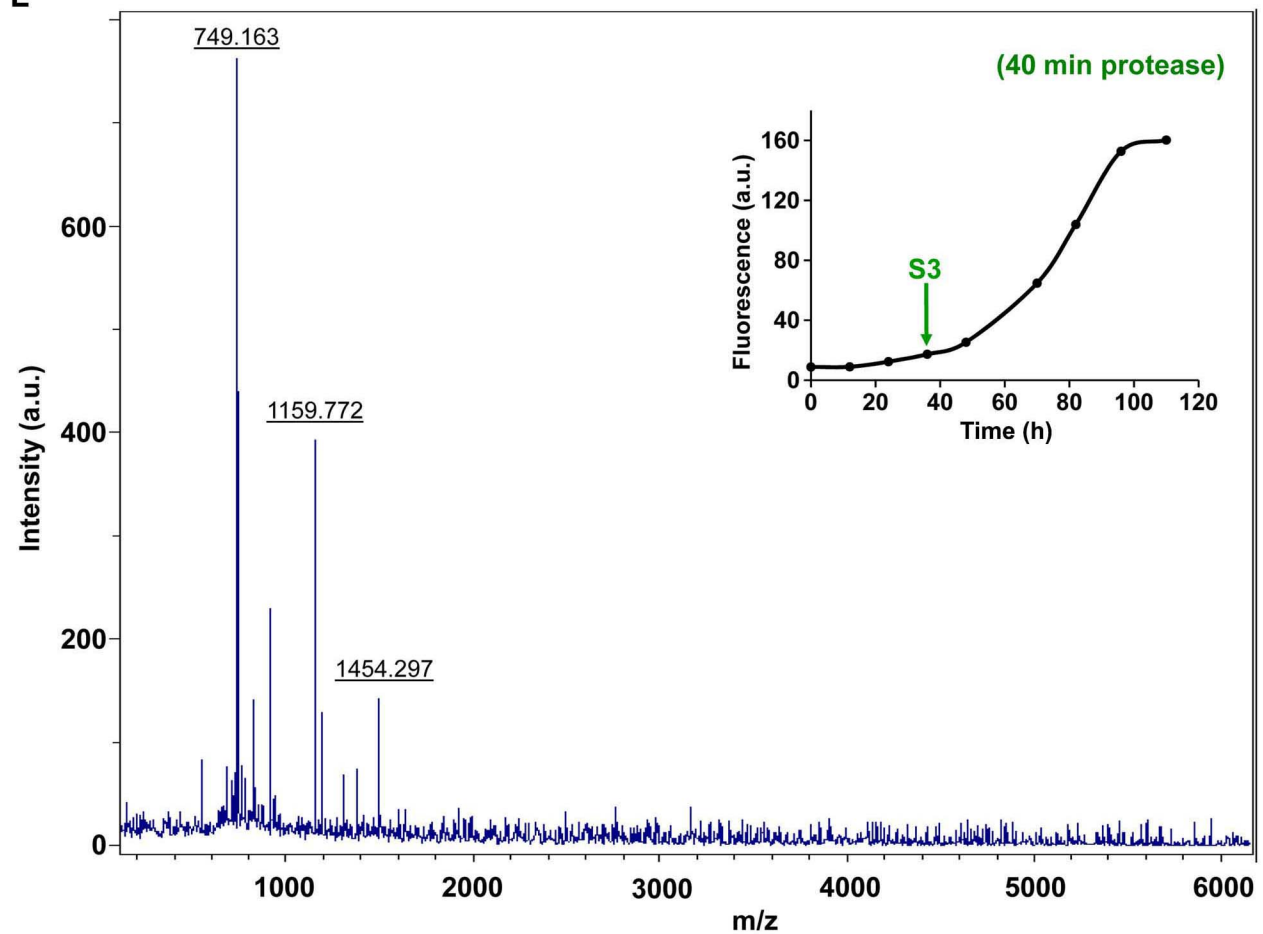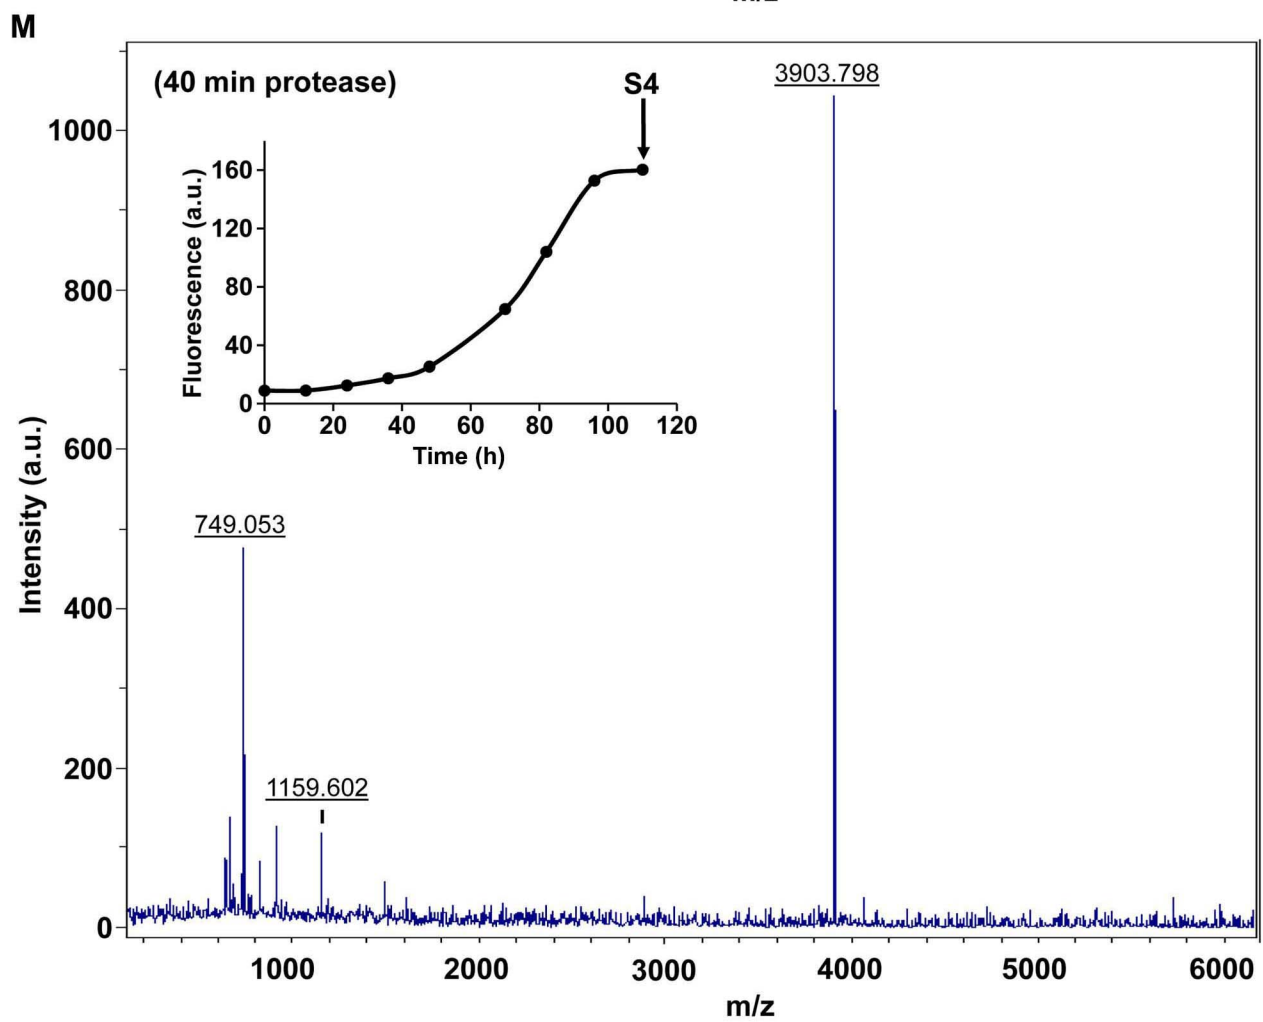

Supplement: supp [file elife-12977-supp-v2.zip]
